# Supplementary material for: Li–Na ternary amidoborane for hydrogen storage: experimental and first-principles study
Source: Royal Society of Chemistry journal article supplement (doi:10.1039/c2dt11819j), 2012-01-01
Supplement: c2dt11819j.pdf [file c2dt11819j.pdf]

Supplementary Information

## Li-Na Ternary Amidoborane for Hydrogen Storage: Experimental and First-principles Study

Wen Li,<sup>a,b</sup> Ling Miao,<sup>d</sup> Ralph H. Scheicher,<sup>c</sup> Zhitao Xiong,<sup>a</sup> Guotao Wu,<sup>\*,\*\*a</sup> C. Moysés Araújo,<sup>c</sup> Andreas Blomqvist,<sup>c</sup> Rajeev Ahuja,<sup>c</sup> Yuanping Feng<sup>b</sup> and Ping Chen<sup>\*,a</sup>

<sup>a</sup>Dalian Institute of Chemical Physics, Chinese Academy of Sciences, 116023, P.R. China. Fax: (+86) 411 84379583; Tel: (+86) 411 84379583; E-mail: \*[pchen@dicp.ac.cn](mailto:pchen@dicp.ac.cn); \*\*[wgt@dicp.ac.cn](mailto:wgt@dicp.ac.cn)

<sup>b</sup>Department of Physics, National University of Singapore, 117542, Singapore

<sup>c</sup>Condensed Matter Theory Group, Department of Physics and Astronomy, Box 516, Uppsala University, SE-751 20 Uppsala, Sweden

<sup>d</sup>Department of Electronic Science and Technology, Huazhong University of Science and Technology, 430074, P. R. China

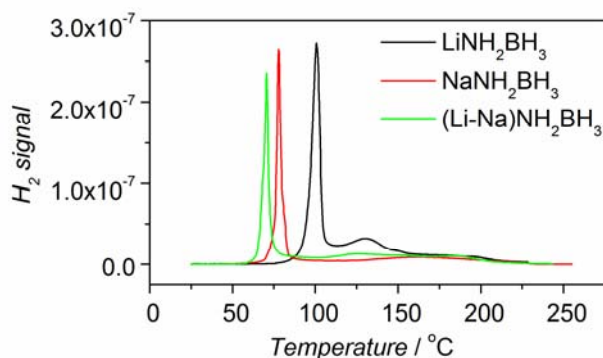

**Fig. S1** Temperature-programmed desorption (TPD) spectra of  $\text{LiNH}_2\text{BH}_3$  (LiAB),  $\text{NaNH}_2\text{BH}_3$  (NaAB) and  $(\text{Li-Na})\text{NH}_2\text{BH}_3$ .

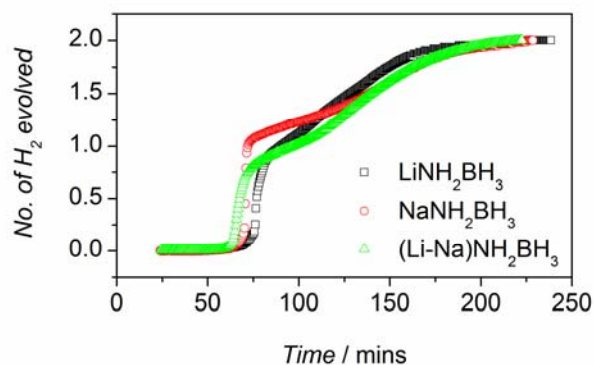

**Fig. S2**  $\text{H}_2$  evolution from  $\text{LiNH}_2\text{BH}_3$  (LiAB),  $\text{NaNH}_2\text{BH}_3$  (NaAB) and  $(\text{Li-Na})\text{NH}_2\text{BH}_3$  during dehydrogenation process. *ca.* 2 equiv.  $\text{H}_2$  ( $\sim 8.9$  wt. %  $\text{H}_2$ ) are detached via a two-step process at temperature below 200 °C, which is similar to the H-desorption processes of LiAB and NaAB. Quantitative measurement of hydrogen desorption at elevated temperatures was carried out on a commercial gas reactor controller provided by the Advanced Materials Corporation. Sample was ramp-heated in argon at  $1 \text{ K min}^{-1}$  each time.

**Table S1** 14 possible symmetrically non-equivalent Li<sub>4</sub>/Na<sub>4</sub> arrangements on 8-cation sites (A, B, C...H are corresponding sites in Fig. S3) in Li<sub>4</sub>Na<sub>4</sub>AB<sub>8</sub>.

| No | Li <sub>4</sub> /Na <sub>4</sub> arrangements |    |    |    |    |    |    |    |
|----|-----------------------------------------------|----|----|----|----|----|----|----|
|    | A                                             | B  | C  | D  | E  | F  | G  | H  |
| 01 | Li                                            | Na | Li | Li | Na | Li | Na | Na |
| 02 | Li                                            | Li | Na | Li | Na | Li | Na | Na |
| 03 | Li                                            | Na | Li | Li | Na | Na | Na | Li |
| 04 | Li                                            | Li | Na | Li | Na | Na | Na | Li |
| 05 | Li                                            | Na | Na | Li | Li | Na | Li | Na |
| 06 | Na                                            | Li | Li | Na | Li | Na | Na | Li |
| 07 | Na                                            | Li | Li | Na | Na | Li | Li | Na |
| 08 | Na                                            | Na | Li | Li | Na | Na | Li | Li |
| 09 | Li                                            | Na | Li | Na | Li | Na | Li | Na |
| 10 | Li                                            | Na | Li | Na | Na | Li | Na | Li |
| 11 | Na                                            | Na | Li | Li | Na | Li | Li | Na |
| 12 | Na                                            | Li | Na | Li | Na | Na | Li | Li |
| 13 | Na                                            | Na | Li | Li | Li | Li | Na | Na |
| 14 | Li                                            | Li | Li | Li | Na | Na | Na | Na |

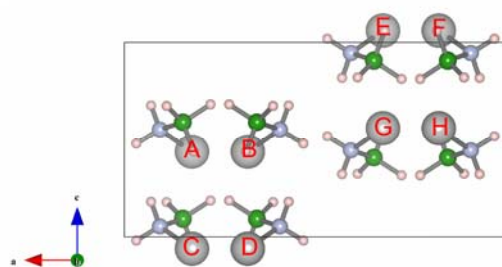

**Fig. S3** Labeled 8-cation sites in unit cell of Li<sub>1-x</sub>Na<sub>x</sub>AB. The possibilities of Li<sub>4</sub>/Na<sub>4</sub> occupation on 8-cation sites are  $C_8^4 = 70$ , we calculated the pair correlation functions of all possible configurations, and categorized them into 14 symmetrically non-equivalent Li/Na arrangements (Table S1), as the symmetrically equivalent arrangements possess the equal pair correlation functions. The optimized structures are displayed in Fig. S4.

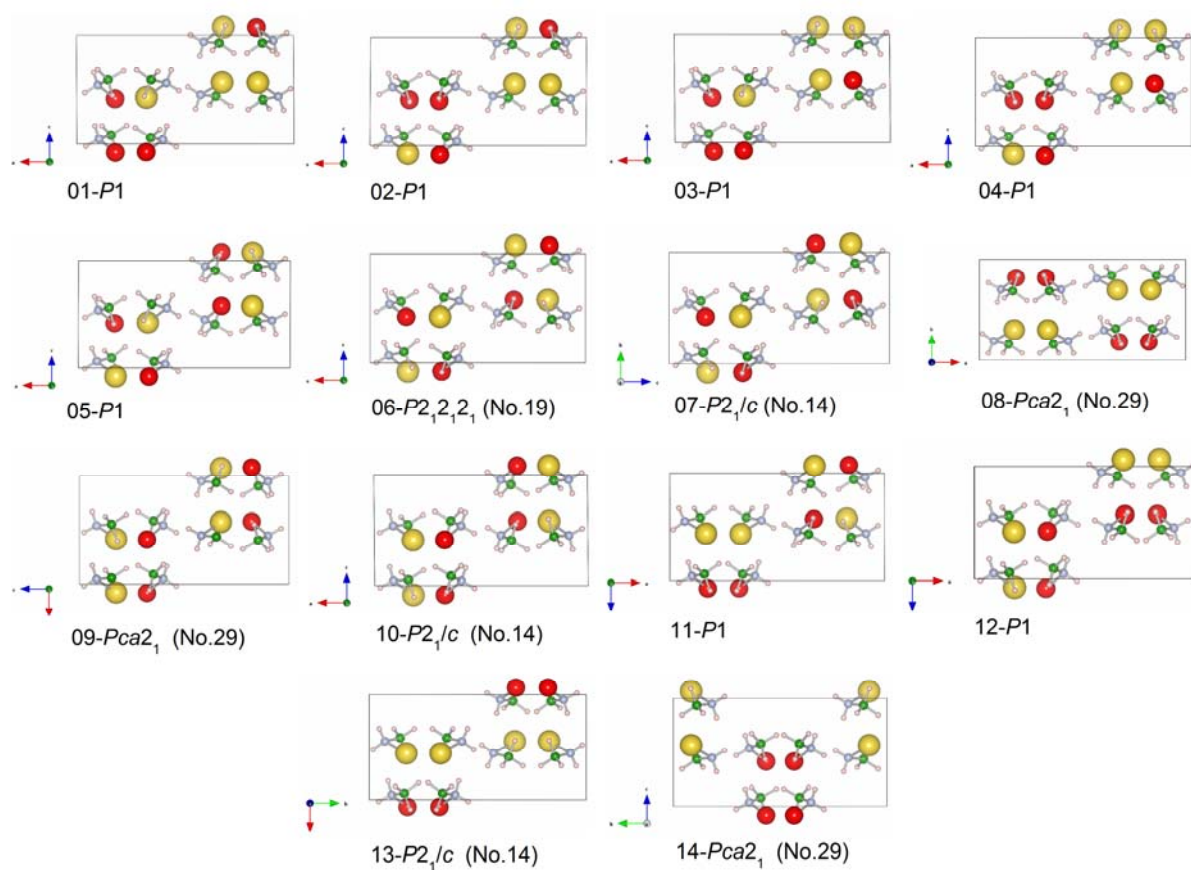

**Fig. S4** The optimized structures of 14 possible symmetrically non-equivalent configurations of  $\text{Li}_4\text{Na}_4\text{AB}_8$ .

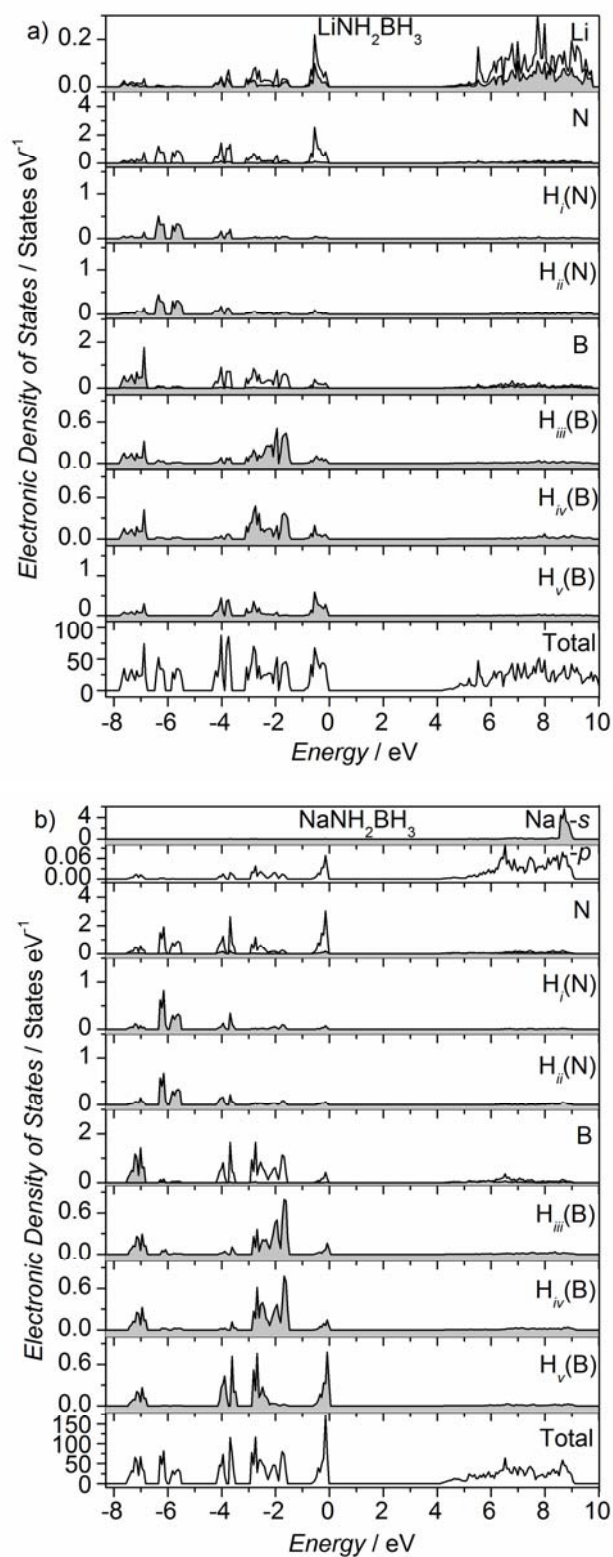

**Fig. S5** The partial and total electronic density of states of (a)  $\text{LiNH}_2\text{BH}_3$  (LiAB) and (b)  $\text{NaNH}_2\text{BH}_3$  (NaAB). The Fermi level is set at zero energy;  $s$ -electron contributions are depicted in gray.

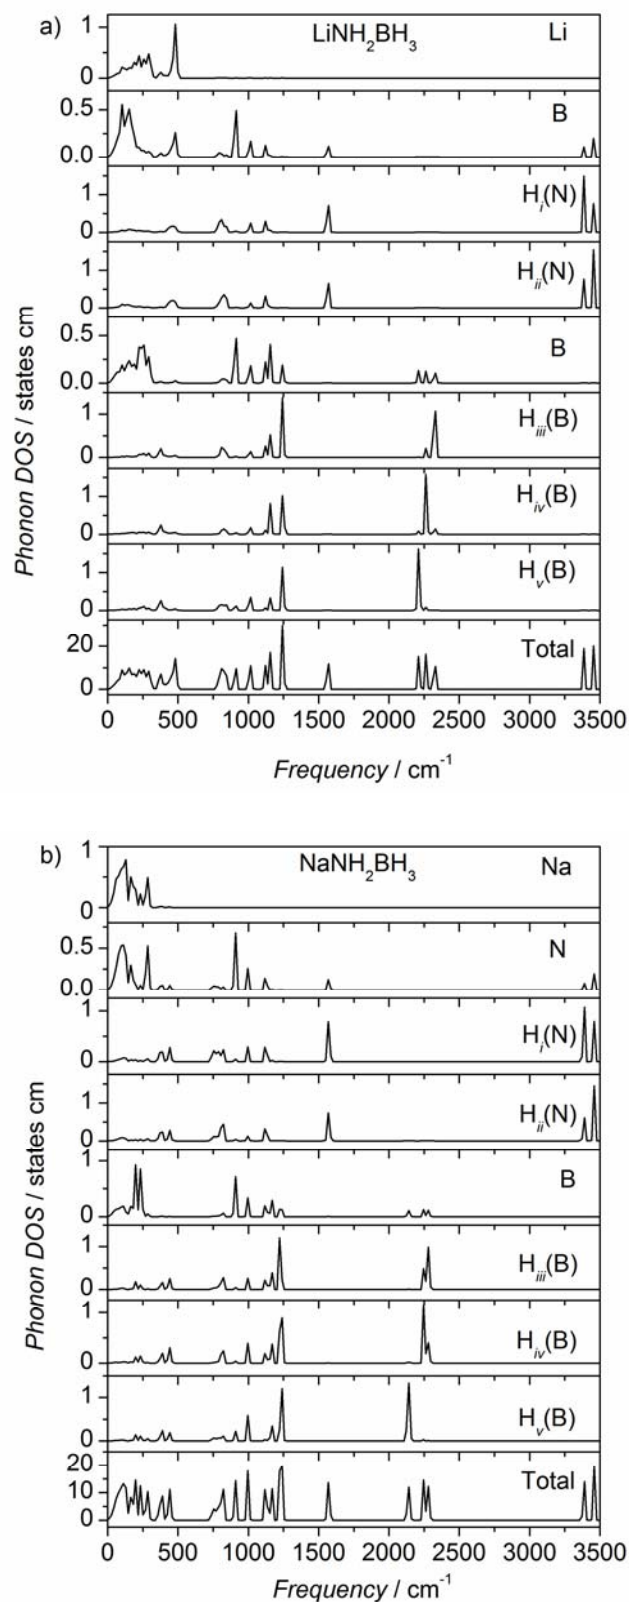

**Fig. S6** The calculated partial and total phonon density of states of (a)  $\text{LiNH}_2\text{BH}_3$  (LiAB) and (b)  $\text{NaNH}_2\text{BH}_3$  (NaAB).
